# Supplementary material
Source: PubMed Central journal article supplement (PMC3309706)
Supplement: NIHMS335975-supplement-01.pdf [file NIHMS335975-supplement-01.pdf]

<Supplemental Online Material>

APPENDIX

Table A1

*Odds that older parent and child ever gave and received goods and money in the prior year: Full results from Model 5 of Tables 3 and 4, survey-adjusted logistic regression, Ismailia, Egypt (N = 4,465)*

|                                 | 1                                     | 2                                     | 3                                              | 4                                              |
|---------------------------------|---------------------------------------|---------------------------------------|------------------------------------------------|------------------------------------------------|
|                                 | Parent gave<br>goods to child<br>(SE) | Parent gave<br>money to child<br>(SE) | Parent received<br>goods from<br>child<br>(SE) | Parent received<br>money from<br>child<br>(SE) |
| <b>Parental characteristics</b> |                                       |                                       |                                                |                                                |
| Mother (ref: father)            | 0.45**<br>(0.11)                      | 0.39**<br>(0.10)                      | 2.44**<br>(0.66)                               | 2.29**<br>(0.54)                               |
| Age in years                    | 0.97<br>(0.02)                        | 0.98<br>(0.02)                        | 1.00<br>(0.02)                                 | 0.99<br>(0.02)                                 |
| Urban residence (ref: rural)    | 0.93<br>(0.18)                        | 1.21<br>(0.25)                        | 0.42**<br>(0.08)                               | 0.61**<br>(0.09)                               |
| Number of living daughters      | 0.85*<br>(0.05)                       | 0.91†<br>(0.05)                       | 0.90†<br>(0.05)                                | 0.90†<br>(0.05)                                |
| Number of living sons           | 0.87**<br>(0.04)                      | 0.90*<br>(0.05)                       | 1.00<br>(0.06)                                 | 1.01<br>(0.06)                                 |
| Married (ref: unmarried)        | 1.24<br>(0.25)                        | 0.88<br>(0.25)                        | 0.56**<br>(0.10)                               | 0.83<br>(0.16)                                 |
| Grades of schooling             | 1.06*<br>(0.03)                       | 1.07**<br>(0.02)                      | 0.96<br>(0.03)                                 | 0.91*<br>(0.03)                                |
| Working at age 50 (ref: no)     | 1.10<br>(0.19)                        | 1.09<br>(0.24)                        | 1.03<br>(0.32)                                 | 1.10<br>(0.28)                                 |
| Household standard of<br>living | 1.09**<br>(0.03)                      | 1.07**<br>(0.03)                      | 1.05<br>(0.03)                                 | 0.99<br>(0.02)                                 |
| ADLs with severe difficulty     | 0.89*<br>(0.05)                       | 0.93<br>(0.04)                        | 0.91*<br>(0.04)                                | 0.93<br>(0.05)                                 |
| Modified MMSE score             | 1.06**<br>(0.02)                      | 1.04†<br>(0.02)                       | 0.97<br>(0.02)                                 | 0.98<br>(0.03)                                 |
| <b>Child's characteristics</b>  |                                       |                                       |                                                |                                                |
| Daughter (ref: son)             | 1.54**<br>(0.20)                      | 1.22<br>(0.18)                        | 0.38**<br>(0.08)                               | 0.27**<br>(0.05)                               |
| Birth order                     | 0.99<br>(0.04)                        | 0.94<br>(0.04)                        | 1.01<br>(0.05)                                 | 1.04<br>(0.06)                                 |
| Age in years                    | 0.98†<br>(0.01)                       | 0.96**<br>(0.01)                      | 1.03<br>(0.02)                                 | 1.04†<br>(0.02)                                |
| Lives with parent (ref: no)     | 3.75**<br>(0.77)                      | 3.26**<br>(0.69)                      | 2.45**<br>(0.39)                               | 2.45**<br>(0.39)                               |
| Grades of schooling             | 0.99<br>(0.01)                        | 0.99<br>(0.01)                        | 1.02<br>(0.01)                                 | 1.02†<br>(0.01)                                |
| Married (ref: unmarried)        | 0.35**<br>(0.09)                      | 0.46**<br>(0.10)                      | 2.63**<br>(0.61)                               | 2.28**<br>(0.47)                               |
| Mother × daughter               | 1.41†<br>(0.25)                       | 1.40†<br>(0.25)                       | 1.14<br>(0.32)                                 | 1.10<br>(0.28)                                 |

Note. † $p \leq .10$ . \* $p \leq .05$ . \*\* $p \leq .01$ .

Table A2

*Sensitivity analyses of the odds that older parent gave goods or money to child in the prior year, Ismailia, Egypt*

|                      | Models 1                                      | Models 2                                        | Models 3                            | Models 4                            | Models 5                     | Models 6                     |
|----------------------|-----------------------------------------------|-------------------------------------------------|-------------------------------------|-------------------------------------|------------------------------|------------------------------|
|                      | Survey-Adjusted (SA) Logistic Regression (LR) | SALR with 1 randomly selected parent–child dyad | LR with family fixed effects sample | LR with parent fixed effects sample | LR with family fixed effects | LR with parent fixed effects |
| <b>Goods</b>         |                                               |                                                 |                                     |                                     |                              |                              |
| Mother (ref: father) | 0.45**<br>(3.41)                              | 0.49†<br>(1.77)                                 | 0.78<br>(1.11)                      |                                     | 0.18**<br>(3.47)             |                              |
| Daughter (ref: son)  | 1.54**<br>(3.26)                              | 1.20<br>(0.71)                                  | 2.34**<br>(5.02)                    | 2.35**<br>(6.43)                    | 3.10**<br>(5.58)             | 6.00**<br>(8.85)             |
| Mother × daughter    | 1.41†<br>(1.99)                               | 1.82<br>(1.67)                                  | 1.50†<br>(1.81)                     |                                     | 1.68*<br>(2.03)              |                              |
| <i>n</i>             | 4,465                                         | 886                                             | 2,135                               | 1,818                               | 2,135                        | 1,818                        |
| <b>Money</b>         |                                               |                                                 |                                     |                                     |                              |                              |
| Mother (ref: father) | 0.39**<br>(3.55)                              | 0.58†<br>(1.76)                                 | 0.66†<br>(1.95)                     |                                     | 0.17**<br>(3.04)             |                              |
| Daughter (ref: son)  | 1.22<br>(1.37)                                | 1.07<br>(0.24)                                  | 1.66**<br>(3.02)                    | 1.39*<br>(2.56)                     | 2.01**<br>(3.42)             | 2.52**<br>(5.19)             |
| Mother × daughter    | 1.40†<br>(1.91)                               | 1.44<br>(0.90)                                  | 1.33<br>(1.25)                      |                                     | 1.35<br>(1.13)               |                              |
| <i>n</i>             | 4,465                                         | 886                                             | 2,065                               | 1,762                               | 2,065                        | 1,762                        |

*Note.* Models 1–4 control for parent attributes (age, urban versus rural residence, numbers of living daughters and living sons aside

from the child in the dyad, marital status, household standard of living, employment status at age 50, number of ADLs with severe difficulty, and M-MMSE score), and child attributes (birth order, grades of schooling, marital status, age, and coresidence with parent). Models 5 control for parent attributes (age, work status at age 50, number of ADLs with severe difficulty, and M-MMSE score) and child attributes (birth order, grades of schooling, marital status, age, and coresidence with parent). Models 6 controls for child attributes (birth order, grades of schooling, marital status, age, and coresidence with parent). T-tests are in parentheses. † $p \leq .10$ . \* $p \leq .05$ . \*\* $p \leq .01$ .

Table A3

*Sensitivity analyses of the odds that older parent received goods or money from child in the prior year, Ismailia, Egypt*

|                      | Models 1                                            | Models 2                                                  | Models 3                                      | Models 4                                      | Models 5                           | Models 6                           |
|----------------------|-----------------------------------------------------|-----------------------------------------------------------|-----------------------------------------------|-----------------------------------------------|------------------------------------|------------------------------------|
|                      | Survey-Adjusted<br>(SA) Logistic<br>Regression (LR) | SALR with 1<br>random parent–<br>child dyad per<br>parent | LR with parents<br>in family fixed<br>effects | LR with parents<br>in parent fixed<br>effects | LR with<br>family fixed<br>effects | LR with<br>parent fixed<br>effects |
| Goods                |                                                     |                                                           |                                               |                                               |                                    |                                    |
| Mother (ref: father) | 2.44**<br>(3.30)                                    | 1.73†<br>(1.97)                                           | 1.65*<br>(2.53)                               |                                               | 8.09**<br>(4.40)                   |                                    |
| Daughter (ref: son)  | 0.38**<br>(4.77)                                    | 0.51†<br>(1.77)                                           | 0.32**<br>(5.84)                              | 0.17**<br>(13.51)                             | 0.26**<br>(5.70)                   | 0.20**<br>(9.44)                   |
| Mother × daughter    | 1.13<br>(0.44)                                      | 0.61<br>(1.06)                                            | 0.98<br>(0.07)                                |                                               | 0.94<br>(0.22)                     |                                    |
| <i>n</i>             | 4,465                                               | 886                                                       | 1,666                                         | 1,384                                         | 1,666                              | 1,384                              |
| Money                |                                                     |                                                           |                                               |                                               |                                    |                                    |
| Mother (ref: father) | 2.29**<br>(3.55)                                    | 2.01†<br>(1.98)                                           | 1.95**<br>(3.32)                              |                                               | 9.55**<br>(4.59)                   |                                    |
| Daughter (ref: son)  | 0.27**<br>(7.24)                                    | 0.43*<br>(2.22)                                           | 0.14**<br>(8.25)                              | 0.10**<br>(16.41)                             | 0.05**<br>(9.78)                   | 0.10**<br>(12.38)                  |
| Mother × daughter    | 1.10<br>(0.38)                                      | 0.50<br>(1.65)                                            | 1.33<br>(1.02)                                |                                               | 2.27*<br>(2.34)                    |                                    |
| <i>n</i>             | 4,465                                               | 886                                                       | 1,789                                         | 1,551                                         | 1,789                              | 1,551                              |

*Note.* Models 1–4 control for parent attributes (age, urban versus rural residence, numbers of living daughters and living sons aside from the child in the dyad, marital status, household standard of living, employment status at age 50, number of ADLs with severe difficulty, and M–MMSE score) and child attributes (birth order, grades of schooling, marital status, age, and coresidence with parent). Models 5 control for parent attributes (age, work status at age 50, number of ADLs with severe difficulty, and M–MMSE score) and child attributes (birth order, grades of schooling, marital status, age, and coresidence with parent). Models 6 control for child attributes (birth order, grades of schooling, marital status, age, and coresidence with parent). T-tests are in parentheses.

† $p \leq .10$ . \* $p \leq .05$ . \*\* $p \leq .01$ .
